# Supplementary material for: Using Patient Feedback to Optimize the Design of a Certolizumab Pegol Electromechanical Self-Injection Device: Insights from Human Factors Studies
Source: PubMed Central journal article supplement — Adv Ther. 2017 Dec 8;35(1):100–15. doi: 10.1007/s12325-017-0645-1 (PMC5778191; doi:10.1007/s12325-017-0645-1), 2017-12-08
Supplement: 12325_2017_645_MOESM1_ESM.pdf [file 12325_2017_645_MOESM1_ESM.pdf]

## Supplementary Material

### Supplementary Table S1. Eligibility for HFS

| Recruitment screener: full criteria by participant population |                                                                                                                                                                                                                                                                                                                                                            |
|---------------------------------------------------------------|------------------------------------------------------------------------------------------------------------------------------------------------------------------------------------------------------------------------------------------------------------------------------------------------------------------------------------------------------------|
| <b>RA patients:</b>                                           | <ul style="list-style-type: none"> <li>• Age <math>\geq 18</math> years</li> <li>• Confirmed diagnosis of moderate to severe active RA</li> <li>• Symptoms involving the fingers, hands, or wrists for <math>\geq 3</math> months</li> <li>• Morning joint stiffness for <math>\geq 10</math> minutes</li> <li>• Currently using RA medications</li> </ul> |
| <b>CD patients:</b>                                           | <ul style="list-style-type: none"> <li>• Age <math>\geq 18</math> years</li> <li>• Confirmed diagnosis of moderate to severe active CD for <math>\geq 3</math> months</li> <li>• <math>&gt;1</math> flare-up in the last 12 months</li> <li>• Currently using CD medications</li> </ul>                                                                    |
| <b>AS patients:</b>                                           | <ul style="list-style-type: none"> <li>• Age <math>\geq 18</math> years</li> <li>• Confirmed diagnosis of active AS for <math>\geq 3</math> months</li> <li>• Currently using AS medications</li> </ul>                                                                                                                                                    |
| <b>PsA patients:</b>                                          | <ul style="list-style-type: none"> <li>• Aged <math>\geq 18</math> years</li> <li>• Confirmed diagnosis of active PsA for <math>\geq 6</math> months</li> <li>• Currently using PsA medications</li> </ul>                                                                                                                                                 |
| <b>CGs:</b>                                                   | <ul style="list-style-type: none"> <li>• CGs who administer subcutaneous injections for a patient with RA, AS, PsA, or CD</li> </ul>                                                                                                                                                                                                                       |
| <b>HCPs:</b>                                                  | <ul style="list-style-type: none"> <li>• HCPs currently in practice, for <math>\geq 2</math> years</li> <li>• Treat <math>\geq 1</math> RA, CD, AS, and/or PsA patient</li> <li>• Administering <math>\geq 4</math> injections per month</li> </ul>                                                                                                        |
| <b>Healthy volunteers:</b>                                    | <ul style="list-style-type: none"> <li>• Age <math>\geq 18</math> years</li> </ul>                                                                                                                                                                                                                                                                         |

AS: ankylosing spondylitis; CD: Crohn's disease; CG: caregiver; HCP: healthcare professional; HFS: human factors studies; PsA: psoriatic arthritis; RA: rheumatoid arthritis.

**Supplementary Table S2. Critical tasks evaluated in EU and US validation studies**

| <b>Task number</b> | <b>Critical Task</b>                                                                            |
|--------------------|-------------------------------------------------------------------------------------------------|
| <b>CT01</b>        | Store DDCs in refrigerator                                                                      |
| <b>CT02</b>        | Configure e-Device for medication dose:<br>1) LD then MD1<br>2) LD then MD2<br>3) MD1<br>4) MD2 |
| <b>CT03</b>        | Distinguish between the training cartridge and medication DDC                                   |
| <b>CT04</b>        | Remove DDC(s) from refrigerator and allow drug product to warm                                  |
| <b>CT05</b>        | Prepare 1 or 2 DDCs                                                                             |
| <b>CT06</b>        | Inspect DDC window to view syringe and contents for visible defects                             |
| <b>CT07</b>        | Choose injection site                                                                           |
| <b>CT08</b>        | Clean injection site                                                                            |
| <b>CT09</b>        | Power up e-Device                                                                               |
| <b>CT10</b>        | Insert DDC and wait for DDC to be drawn into e-Device                                           |
| <b>CT11</b>        | Remove needle cap                                                                               |
| <b>CT12</b>        | Position e-Device                                                                               |
| <b>CT13</b>        | Observe injection progress                                                                      |
| <b>CT14</b>        | Interrupt injection (if necessary)                                                              |
| <b>CT15</b>        | Resume injection (following pause or interrupted injection)                                     |
| <b>CT16</b>        | Remove e-Device from injection site following a completed injection                             |
| <b>CT17</b>        | Re-cap DDC                                                                                      |
| <b>CT18</b>        | Pull DDC from e-Device                                                                          |
| <b>CT19</b>        | Observe date of next injection                                                                  |
| <b>CT20</b>        | Dispose of used DDC(s) in sharps bin                                                            |
| <b>CT21</b>        | Clean e-Device                                                                                  |
| <b>CT22</b>        | Respond to high and medium priority alarms appropriately                                        |

Critical task outcomes were reported as 'successes' (completed the task without mistakes), 'successes with difficulties' (completed the task within 3 attempts), or 'failures' (did not succeed within 3 attempts). DDC: dose-dispenser cartridge; LD: loading dose; MD1: maintenance dose 1 (200 mg every other week); MD2: maintenance dose 2 (400 mg every 4 weeks).

**Supplementary Table S3. Study participants - formative (early prototype)**

| <b>Study</b>                         | <b>1</b>     | <b>2</b>     | <b>3</b>    |             |           | <b>4</b>    |            |
|--------------------------------------|--------------|--------------|-------------|-------------|-----------|-------------|------------|
| <b>Participant</b>                   | <b>RA</b>    | <b>RA</b>    | <b>Vol</b>  | <b>HCP</b>  | <b>CG</b> | <b>Vol</b>  | <b>HCP</b> |
| <b>N</b>                             | 14           | 14           | 7           | 4           | 1         | 10          | 1          |
| <b>Age, years, mean</b>              | 41.8         | 39.7         | 36.7        | 41.5        | 59.0      | 36.6        | 42.0       |
| Min                                  | 18           | 18           | 26          | 33          | 59        | 23          | 42         |
| Max                                  | 61           | 57           | 53          | 54          | 59        | 62          | 42         |
| <b>Sex, F, n (%)</b>                 | 11<br>(78.6) | 13<br>(92.9) | 3<br>(42.9) | 3<br>(75.0) | 0         | 7<br>(70.0) | 0          |
| <b>Ethnicity</b>                     | NR           | NR           | NR          | NR          | NR        | NR          | NR         |
| <b>Years since diagnosis, mean</b>   | 14.0         | 16.1         | NA          | NA          | NA        | NA          | NA         |
| Min-Max                              | 5-31         | 1-47         |             |             |           |             |            |
| <b>Disease severity<sup>a</sup></b>  |              |              |             |             |           |             |            |
| Moderate                             | 9            | 9            | NA          | NA          | NA        | NA          | NA         |
| Moderate to severe                   | 0            | 0            |             |             |           |             |            |
| Severe                               | 5            | 5            |             |             |           |             |            |
| <b>Handedness</b>                    |              |              |             |             |           |             |            |
| Left                                 | NR           | NR           | 1           | 0           | 0         | 10          | 0          |
| Right                                |              |              | 6           | 4           | 1         | 0           | 1          |
| Both                                 |              |              | 0           | 0           | 0         | 0           | 0          |
| <b>Prior injection experience, n</b> |              |              |             |             |           |             |            |
| Pre-filled pen                       | NR           | NR           | 2           | 2           | 1         | 0           | 0          |
| Pre-filled syringe                   |              |              | 2           | 3           | 1         | 0           | 0          |
| Standard syringe                     |              |              | 2           | 4           | 1         | 0           | 1          |

<sup>a</sup>Levels of disease severity were self-reported by patients. CG: caregiver; HCP: healthcare professional; NA: not applicable; NR: not reported; RA: rheumatoid arthritis; Vol: healthy volunteer.

**Supplementary Table S4. Study participants - formative (fully functioning e-Device)**

| Study                                            | 5         |           | 6         | 7         |           |           |           |           |           | 8         | 9         | 10        |           | 12         |            |            |            |           |           |
|--------------------------------------------------|-----------|-----------|-----------|-----------|-----------|-----------|-----------|-----------|-----------|-----------|-----------|-----------|-----------|------------|------------|------------|------------|-----------|-----------|
|                                                  | RA        | HCP       | RA        | CG        | HCP       | RA        | AS        | CD        | PsA       | Vol       | Vol       | RA        | HCP       | RA         | CD         | AS         | PsA        | CG        | HCP       |
| <b>N</b>                                         | 8         | 3         | 10        | 5         | 8         | 8         | 6         | 6         | 7         | 9         | 9         | 8         | 8         | 1          | 2          | 1          | 1          | 6         | 6         |
| <b>Age, years, mean</b>                          | 65.1      | 44.0      | 52.5      | 38.6      | 51.0      | 52.5      | 41.0      | 44.8      | 58.0      | 51.9      | 37.7      | 52.0      | 47.0      | 46.8       |            |            |            | 56.5      | 47.2      |
| Min                                              | 48        | 35        | 38        | 25        | 33        | 34        | 20        | 25        | 37        | 28        | 29        | 23        | 32        | 29         |            |            |            | 45        | 35        |
| Max                                              | 78        | 49        | 67        | 57        | 65        | 66        | 58        | 57        | 64        | 69        | 56        | 69        | 59        | 57         |            |            |            | 62        | 65        |
| <b>Sex, F, n (%)</b>                             | 3<br>(38) | 2<br>(67) | 7<br>(70) | 3<br>(60) | 3<br>(39) | 7<br>(88) | 1<br>(17) | 4<br>(67) | 1<br>(14) | 4<br>(44) | 4<br>(44) | 5<br>(63) | 5<br>(63) | 1<br>(100) | 2<br>(100) | 1<br>(100) | 1<br>(100) | 4<br>(67) | 4<br>(67) |
| <b>Ethnicity</b>                                 |           |           |           |           |           |           |           |           |           |           |           |           |           |            |            |            |            |           |           |
| White <sup>a</sup>                               | 8         | 2         | 10        | 1         | 4         | 2         | 3         | 5         | 5         | NR        | NR        | 6         | 6         | 4          |            |            |            | 2         | 2         |
| Other <sup>b</sup>                               | 0         | 1         | 0         | 4         | 4         | 6         | 3         | 1         | 2         |           |           | 2         | 2         | 1          |            |            |            | 4         | 4         |
| <b>Years since diagnosis, mean</b>               | 18.3      | NA        | NR        | NA        | NA        | 12.6      | 17.8      | 17.2      | 6.4       | NR        | NR        | NR        | NA        | 1          | 8.5        | 4          | 1          | NA        | NA        |
| Min-Max                                          | 1-32      |           |           |           |           | 1-46      | 1-42      | 0-34      | 2-12      |           |           |           |           |            | 7-10       |            |            |           |           |
| <b>Disease severity<sup>c</sup></b>              |           |           |           |           |           |           |           |           |           |           |           |           |           |            |            |            |            |           |           |
| Moderate/active                                  | 4         | NA        | 0         | NA        | NA        | 0         | 0         | 0         | 0         | NA        | NA        | 7         | NA        | 0          | 0          | 1          | 1          | NA        | NA        |
| Moderate to severe                               | 3         |           | 10        |           |           | 8         | 6         | 6         | 7         |           |           | 1         |           | 1          | 2          | 0          | 0          |           |           |
| Severe                                           | 1         |           | 0         |           |           | 0         | 0         | 0         | 0         |           |           | 0         |           | 0          | 0          | 0          | 0          |           |           |
| <b>Handedness</b>                                |           |           |           |           |           |           |           |           |           |           |           |           |           |            |            |            |            |           |           |
| Left                                             | 2         | 0         | 1         | 1         | 1         | 2         | 0         | 0         | 2         | 1         | 1         | 0         | 2         | 0          | 0          | 0          | 0          | 1         | 0         |
| Right                                            | 6         | 3         | 9         | 4         | 7         | 6         | 6         | 6         | 5         | 8         | 8         | 8         | 6         | 1          | 2          | 1          | 1          | 5         | 6         |
| Both                                             | 0         | 0         | 0         | 0         | 0         | 0         | 0         | 0         | 0         | 0         | 0         | 0         | 0         | 0          | 0          | 0          | 0          | 0         | 0         |
| <b>Prior injection experience, n<sup>d</sup></b> |           |           |           |           |           |           |           |           |           |           |           |           |           |            |            |            |            |           |           |
| Pre-filled pen                                   | 0         | NR        | NR        | NR        | 6         | 1         | 1         | 1         | 1         | NR        | NR        | 1         | 8         | 1          | 1          | 0          | 0          | 2         | 6         |
| Pre-filled syringe                               | 3         |           |           |           | 7         | 5         | 2         | 2         | 6         |           |           | 5         | 8         | 0          | 1          | 0          | 0          | 1         | 6         |
| Syringe and needle/vial                          | 1         |           |           |           | 0         | 0         | 0         | 0         | 0         |           |           | 0         | 8         | 0          | 0          | 0          | 0          | 3         | 6         |

<sup>a</sup>“White” is composed of “White”, “White other”, “White British”, and “White American”; <sup>b</sup>“Other” is composed of “African American”, Southeast Asian / Middle East”, “India / Pakistan / Middle East”, “Mexican / Hispanic / Latino”, “Black / African / Caribbean”, “Other (not stated)”, “Black”, and “Asian”. <sup>c</sup>Levels of disease severity were self-reported by patients, with the exception of study 5, where specialists verified disease status; <sup>d</sup>Injection responses are not mutually exclusive. AS: ankylosing spondylitis; CD: Crohn’s disease; CG: caregiver; HCP: healthcare professional; NA: not applicable; NR: not reported; PsA: psoriatic arthritis; RA: rheumatoid arthritis; Vol: healthy volunteer.
